# Supplementary material
Source: PubMed Central journal article supplement (PMC7276322)
Supplement: mmc1.pdf [file mmc1.pdf]

**Immunity, Volume 53**

**Supplemental Information**

**Analysis of a SARS-CoV-2-Infected Individual Reveals**

**Development of Potent Neutralizing Antibodies**

**with Limited Somatic Mutation**

**Emilie Seydoux, Leah J. Homad, Anna J. MacCamy, K. Rachael Parks, Nicholas K. Hurlburt, Madeleine F. Jennewein, Nicholas R. Akins, Andrew B. Stuart, Yu-Hsin Wan, Junli Feng, Rachael E. Whaley, Suruchi Singh, Michael Boeckh, Kristen W. Cohen, M. Juliana McElrath, Janet A. Englund, Helen Y. Chu, Marie Pancera, Andrew T. McGuire, and Leonidas Stamatatos**

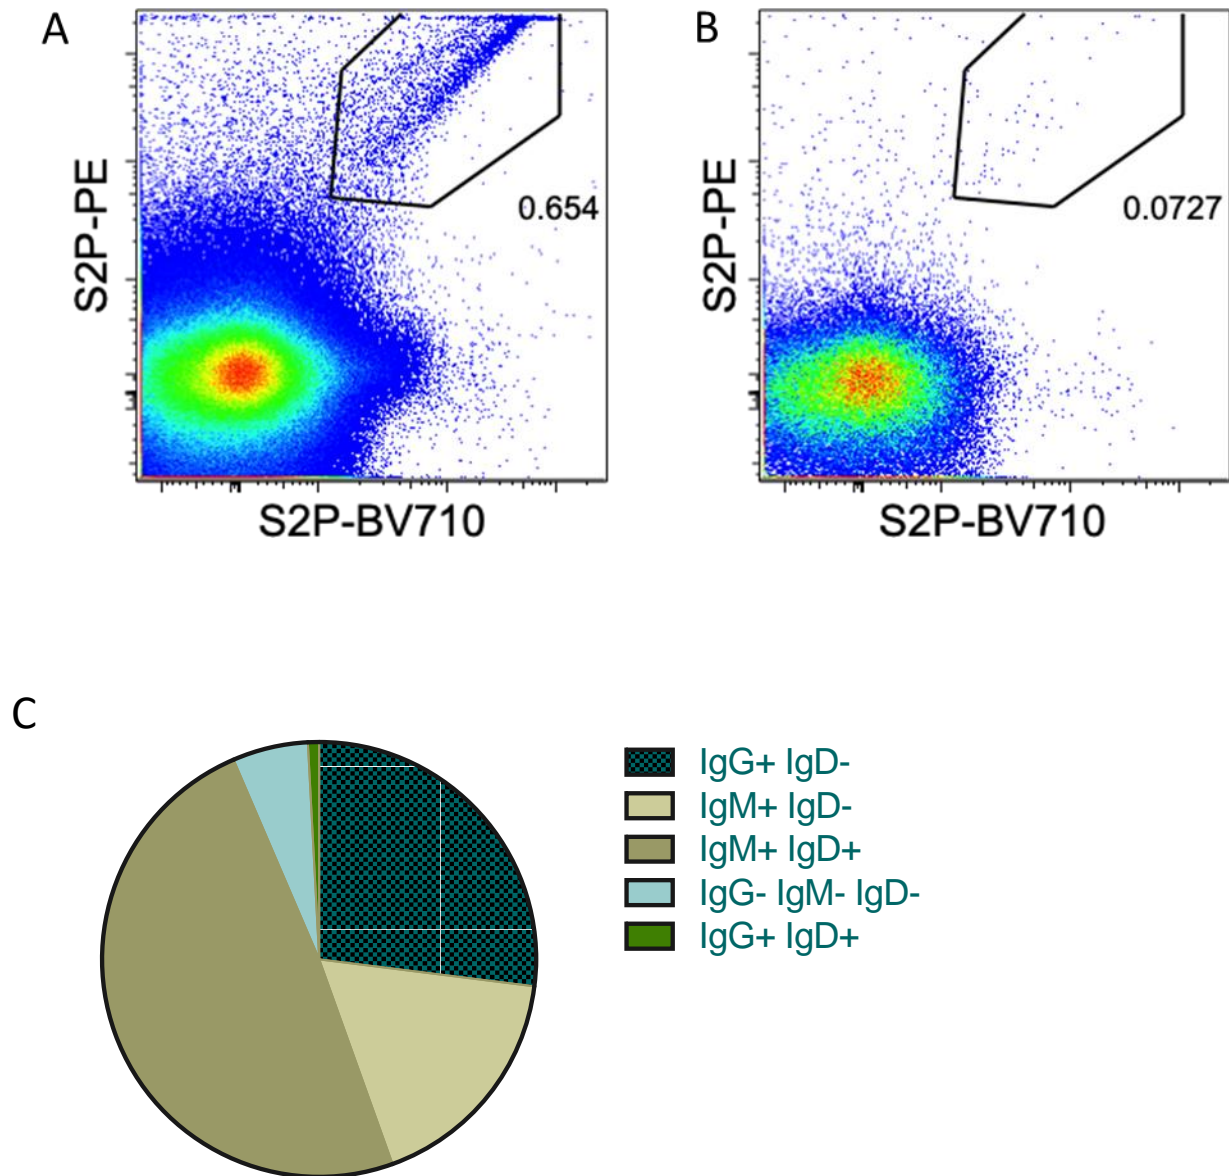

**Figure S1. Identification and isolation of SARS-CoV-2 specific B cells by flow cytometry, related to Figure 2.** Staining of PBMCs with S2P-probes gated on total live CD3<sup>-</sup> CD19<sup>+</sup> B cells indicating the frequency of S2P<sup>+</sup> B cells for the (A) confirmed SARS-CoV-2 donor ~3 weeks post-infection and (B) a pre-pandemic control subject. (C) the proportion of S2P<sup>+</sup> B cells analyzed from the SARS-CoV-2<sup>+</sup> participant by isotype expression.

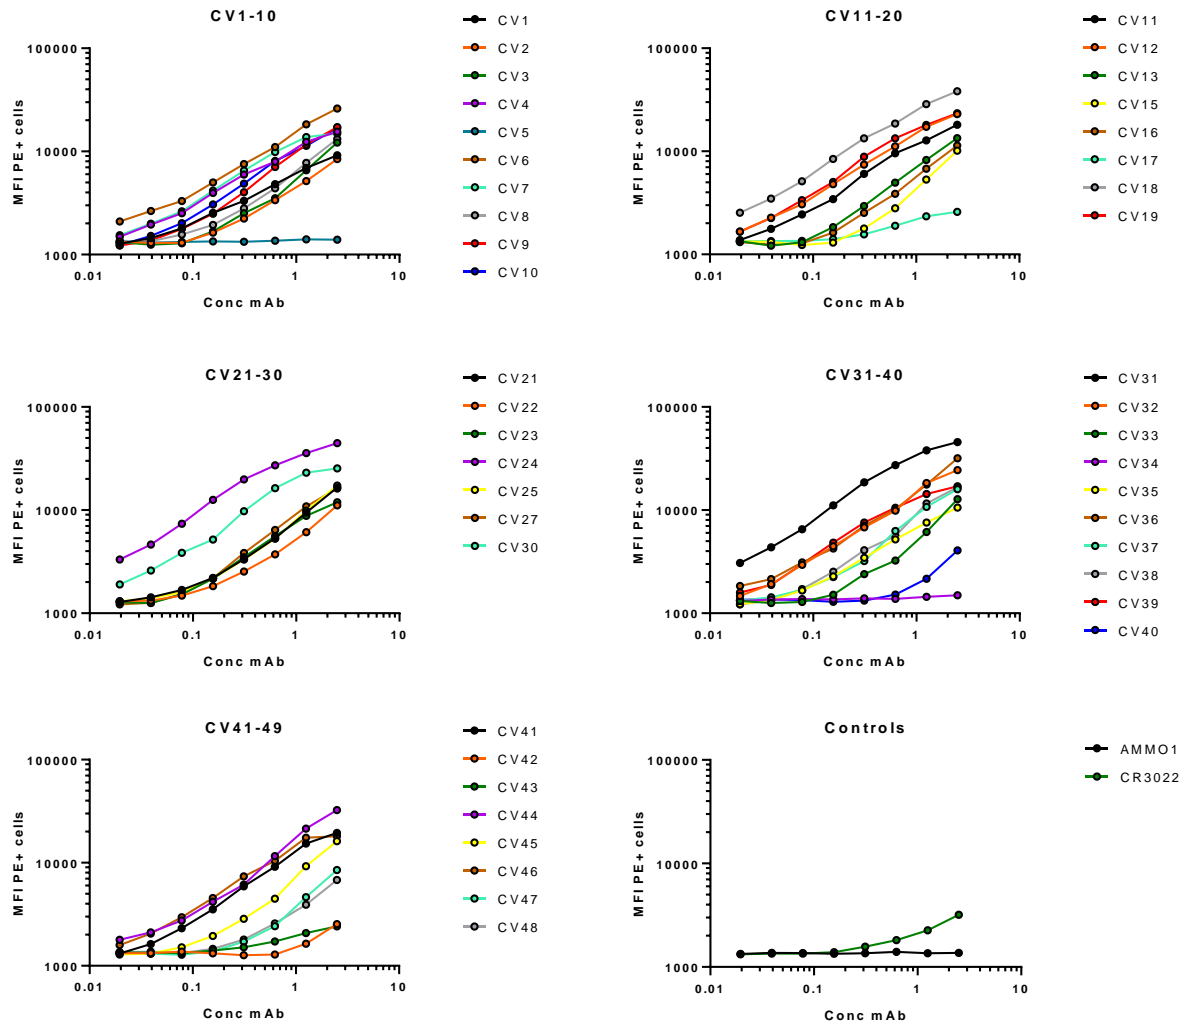

**Figure S2. Staining of cell-surface expressed SARS-CoV-2 S, related to Figure 3.** The indicated mAbs were labeled with phycoerythrin (PE) and used to stain 293E cells transfected with wildtype SARS-Cov-2 S by flow cytometry at the indicated dilutions. The mean fluorescence intensity (MFI) of PE<sup>+</sup> cells is shown.

**Table S1. Neutralizing activity and gene usage of cloned mAbs, related to figures 2 and 3. mAbs shaded with the same color are clonally related.**

| mAb  | IC50 (µg/ml)  | Isotype | VH gene       | AA mutations | VH/VL gene  | AA mutations |
|------|---------------|---------|---------------|--------------|-------------|--------------|
| CV1  | 15±6.4 n=6    | IgG     | IGHV4-38*02   | 0            | IGLV1-44*01 | 0            |
| CV2  | >50           | IgG     | IGHV3-30*04   | 0            | IGKV3-15*01 | 0            |
| CV3  | >50           | IgG     | IGHV7-4-1*02  | 7            | IGKV1-39*01 | 7            |
| CV4  | >50           | IgG     | IGHV3-30*01   | 0            | IGKV1-5*03  | 0            |
| CV5  | >50           | N/D     | IGHV1-46*01   | 3            | IGKV4-1*01  | 1            |
| CV6  | >50           | N/D     | IGHV1-24*01   | 0            | IGKV3-20*01 | 0            |
| CV7  | >50           | IgG     | IGH3-30*01    | 0            | IGKV1-5*03  | 0            |
| CV8  | >50           | IgG     | IGHV1-18*01   | 0            | IGKV3-20*01 | 0            |
| CV9  | >50           | IgG     | IGHV4-39*01   | 0            | IGLV2-14*01 | 1            |
| CV10 | >50           | IgG     | IGHV4-59*01   | 1            | IGKV3-20*01 | 1            |
| CV11 | >50           | IgG     | IGHV4-31*03   | 0            | IGKV3-11*01 | 0            |
| CV12 | >50           | IgG     | IGHV3-30*04   | 15           | IGKV2-30*01 | 6            |
| CV13 | >50           | IgG     | IGH7-4-1*02   | 7            | IGKV1-39*01 | 7            |
| CV15 | >50           | IgG     | IGHV3-7*01    | 0            | IGLV2-11*01 | 0            |
| CV16 | >50           | IgG     | IGHV5-51*01   | 0            | IGKV3-20*01 | 0            |
| CV17 | >50           | N/D     | IGHV1-2*02    | 0            | IGLV2-23*01 | 0            |
| CV18 | >50           | IgG     | IGHV1-24*01   | 0            | IGLV1-51*01 | 0            |
| CV19 | >50           | N/D     | IGHV1-2*02    | 0            | IGKV3-20*01 | 0            |
| CV21 | >50           | IgG     | IGHV3-15*01   | 0            | IGKV3-11*01 | 0            |
| CV22 | >50           | N/D     | IGHV3-21*01   | 0            | IGLV4-69*01 | 0            |
| CV23 | >50           | IgG     | IGHV1-3*01    | 0            | IGLV3-25*03 | 0            |
| CV24 | >50           | IgG     | IGHV1-24*01   | 0            | IGLV1-51*01 | 0            |
| CV25 | >50           | IgG     | IGHV4-30-4*01 | 0            | IGKV3-15*01 | 0            |
| CV26 | >50           | IgG     | IGHV3-30-3*01 | 0            | IGKV1-17*01 | 0            |
| CV27 | >50           | IgG     | IGHV3-30*04   | 1            | IGLV2-14*01 | 1            |
| CV30 | 0.03±0.02 n=6 | IgG     | IGHV3-53*01   | 2            | IGKV3-20*01 | 0            |
| CV31 | >50           | IgG     | IGHV1-24*01   | 0            | IGLV1-51*01 | 0            |
| CV32 | >50           | IgG     | IGHV1-2*02    | 2            | IGLV1-51*01 | 0            |
| CV33 | >50           | IgG     | IGHV1-18*01   | 1            | IGLV1-40*1  | 0            |
| CV34 | >50           | IgG     | IGHV3-30-3*01 | 0            | IGLV3-12*02 | 0            |
| CV35 | 20.7 n=1      | IgG     | IGHV4-38*02   | 0            | IGLV1-44*01 | 0            |
| CV36 | >50           | IgG     | IGHV1-2*02    | 3            | IGLV3-25*03 | 1            |
| CV37 | >50           | IgG     | IGHV1-18*01   | 0            | IGKV1-33*01 | 0            |
| CV38 | >50           | IgG     | IGHV3-30*04   | 0            | IGKV3-11*01 | 0            |
| CV39 | >50           | IgG     | IGHV3-30*04   | 14           | IGKV2-30*01 | 2            |
| CV40 | >50           | IgG     | IGHV1-18*01   | 2            | IGKV1-17*01 | 0            |
| CV41 | >50           | IgG     | IGHV3-30*04   | 0            | IGKV3-15*01 | 0            |

|      |     |     |             |    |             |   |
|------|-----|-----|-------------|----|-------------|---|
| CV42 | >50 | IgG | IGHV1-18*01 | 1  | IGKV1-39*01 | 1 |
| CV43 | >50 | IgG | IGHV3-30*04 | 0  | IGLV6-57*02 | 0 |
| CV44 | >50 | IgG | IGHV1-46*01 | 0  | IGLV3-25*03 | 1 |
| CV45 | >50 | IgG | IGHV1-18*01 | 0  | IGLV1-40*01 | 0 |
| CV46 | >50 | IgG | IGHV3-30*04 | 15 | IGKV2-30*01 | 5 |
| CV47 | >50 | IgG | IGHV1-18*01 | 2  | IGKV1-17*01 | 0 |
| CV48 | >50 | IgG | IGHV1-69*09 | 3  | IGKV2-30*01 | 1 |
| CV50 | N/D | IgG | IGHV3-33*01 | 0  | IGLV3-10*01 | 0 |

\*N/D: not determined

**Table S2. Kinetic analyses of the ACE2 and CV30 IgG interactions with SARS-CoV-2 RBD, related to figure 4.**

| Ligand          | Analyte         | $K_D$<br>(M X10 <sup>-9</sup> ) | $k_{on}$<br>(1/Ms)X10 <sup>4</sup> | $K_{on}$<br>errorX10 <sup>3</sup> | $k_{off}$<br>(1/s)X10 <sup>-3</sup> | $k_{off}$<br>error X 10 <sup>-5</sup> |
|-----------------|-----------------|---------------------------------|------------------------------------|-----------------------------------|-------------------------------------|---------------------------------------|
| ACE2 ectodomain | SARS-CoV -2 RBD | 4.40                            | 50.8                               | 15.1                              | 2.22                                | 1.99                                  |
| CV30 IgG        | SARS-CoV -2 RBD | 3.63                            | 8.36                               | 2.97                              | 0.30                                | 0.30                                  |
